# Supplementary material for: ABCC Multidrug Transporters in Childhood Neuroblastoma: Clinical and Biological Effects Independent of Cytotoxic Drug Efflux
Source: PubMed Central journal article supplement — J Natl Cancer Inst. 2011 Jul 28;103(16):1236–51. doi: 10.1093/jnci/djr256 (PMC3156802; doi:10.1093/jnci/djr256), 2011-07-28
Supplement: supp_djr256_jnci_JNCI_10_0247_s01.pdf [file supp_djr256_jnci_JNCI_10_0247_s01.pdf]

Supplementary Data for:

ABCC Multidrug Transporters in Childhood Neuroblastoma: Clinical and Biological Effects  
Independent of Cytotoxic Drug Efflux

**Haber, M *et al.***

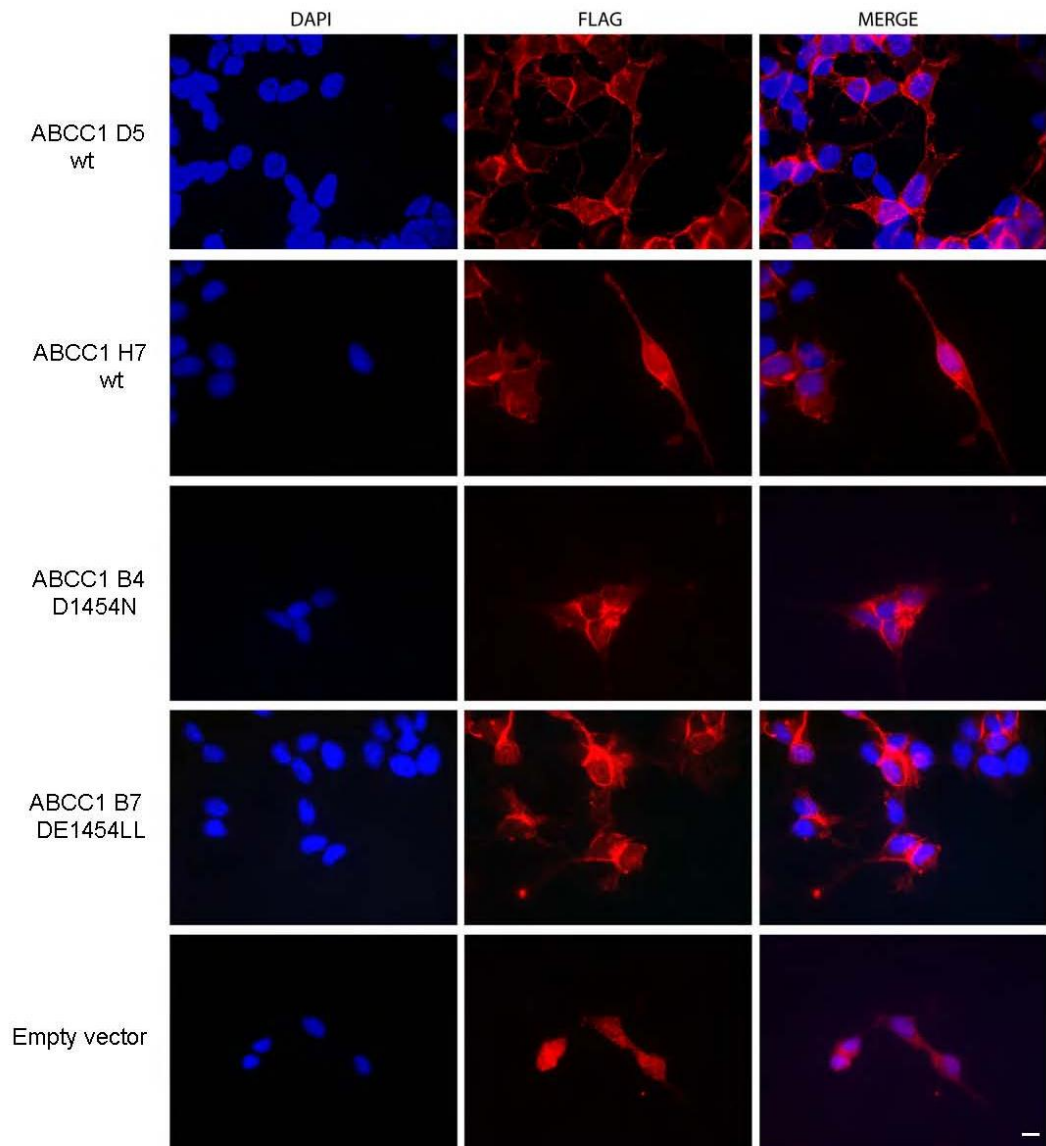

**Supplementary Figure 1.** Expression of FLAG-ABCC1 in SH-SY5Y neuroblastoma cells. Immunofluorescent detection of FLAG-tagged ABCC1 in SH-SY5Y neuroblastoma cell clones stably expressing either ABCC1-wt (clones D5, H7), ABCC1 D1454N single mutant (clone B4) or ABCC1 DD1454LL double mutant (clone B7). Cell preparations were stained with either monoclonal antibody M2 anti-FLAG (FLAG), or DAPI to visualize nuclei. Strong membranous staining of FLAG-ABCC1 was observed in the majority of cells transfected with all ABCC1 constructs (MERGE). Scale bar = 15 $\mu$ m. ABCC1= ATP-binding cassette, sub-family C, member 1; DAPI= 4'-6-Diamidino-2-phenylindole.

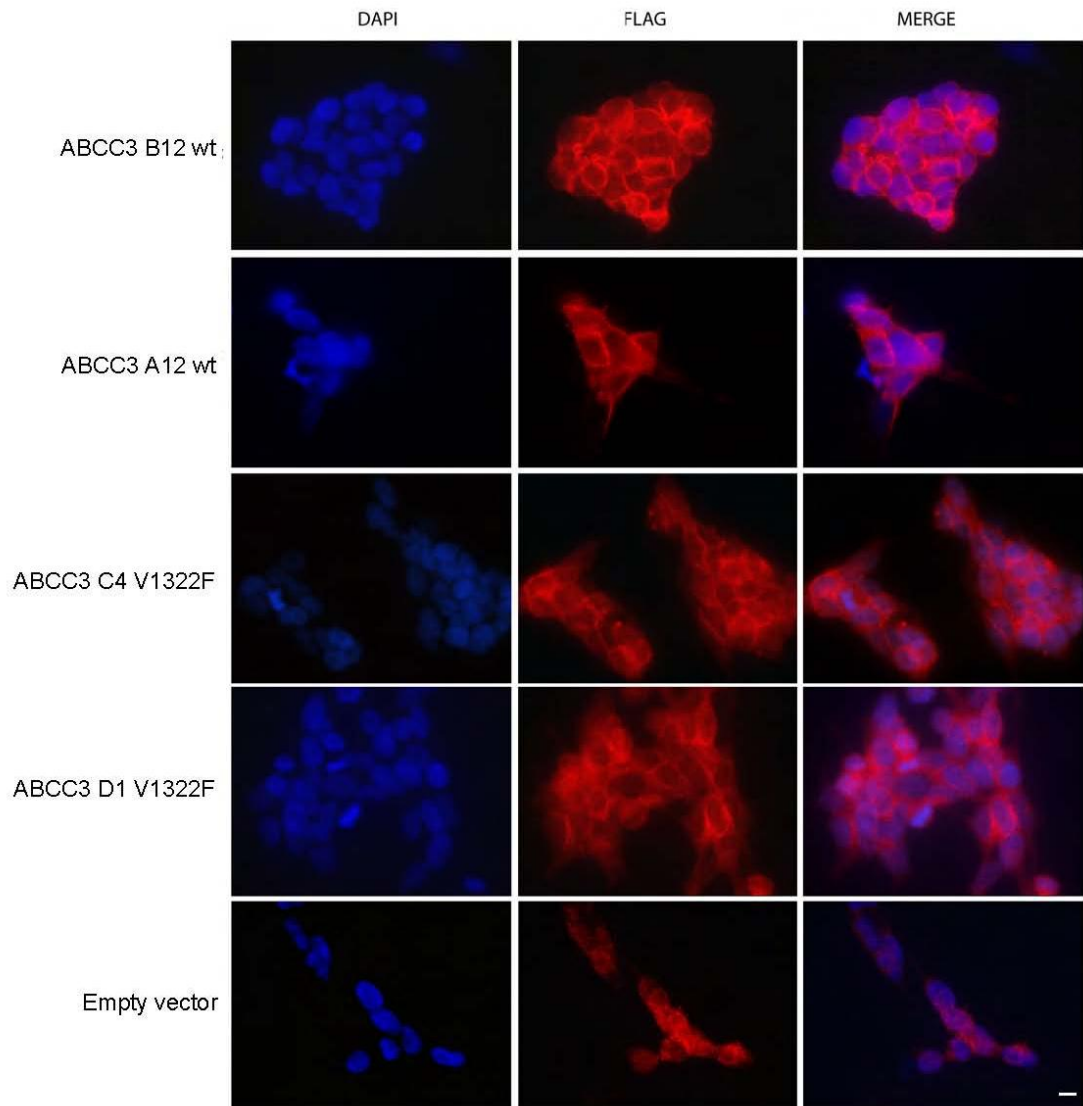

**Supplementary Figure 2.** Expression of FLAG-ABCC3 in BE(2)-C neuroblastoma cells. Immunofluorescent detection of FLAG-tagged ABCC3 in BE(2)-C neuroblastoma cell clones stably expressing either ABCC3-wt (clones A12, B12) or ABCC3 V1322F mutant (clones C4, D1). Cell preparations were stained with either monoclonal antibody M2 anti-FLAG (FLAG), or DAPI to visualize nuclei. Strong membranous staining of FLAG-ABCC3 was observed in the majority of cells transfected with both ABCC3 constructs (MERGE). Scale bar = 15 $\mu$ m. ABCC3= ATP-binding cassette, sub-family C, member 3; DAPI= 4'-6-Diamidino-2-phenylindole.

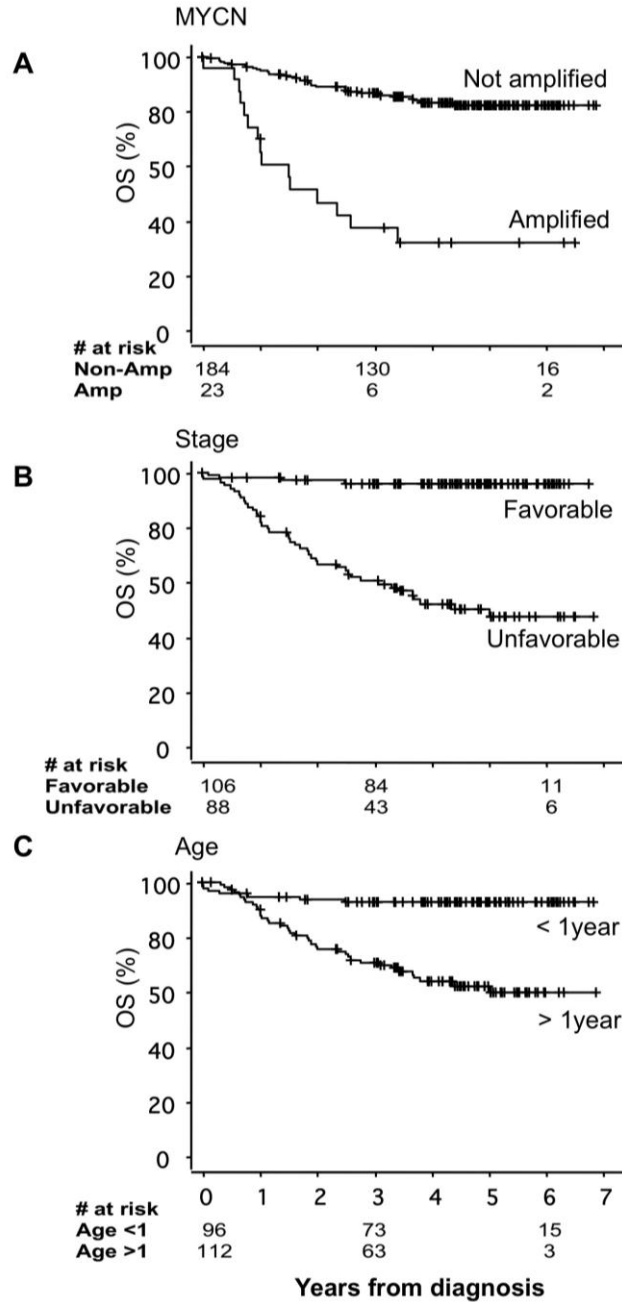

**Supplementary Figure 3.** Cumulative survival of 209 patients with neuroblastoma. The Kaplan-Meier curves show the probability of overall survival (OS) with respect to **A**) the number of copies of *MYCN* found by fluorescence *in situ* hybridization (5-year overall survival rate  $\pm$  SEM: *MYCN* amplified,  $32 \pm 10$  % vs not amplified,  $82 \pm 3$  %,  $P < .001$ ); **B**) tumor stage, categorized as favorable (INSS stages 1, 2A/2B or 4S) or unfavorable (INSS stages 3 or 4) (5-year overall survival rate  $\pm$  SEM: favorable stage,  $96 \pm 2$  % vs unfavorable stage,  $50 \pm 6$  %,  $P < .001$ ); and **C**) the patient's age at diagnosis (5-year overall survival rate  $\pm$  SEM: age  $< 1$  year,  $93 \pm 3$  % vs age  $> 1$  year,  $62 \pm 5$  %,  $P < .001$ ).  $P$  values were determined by the log-rank test. Tick marks indicate the length of follow-up of individual patients who survived. The median follow-up after diagnosis among the surviving patients was 55 months (range, 0-196). At 0, 3 and 6 years from diagnosis, the number of patients at risk of death are shown. SEM = standard error of the mean. *MYCN* = *v-myc myelocytomatosis viral related oncogene, neuroblastoma derived*. INSS = International Neuroblastoma Staging System.

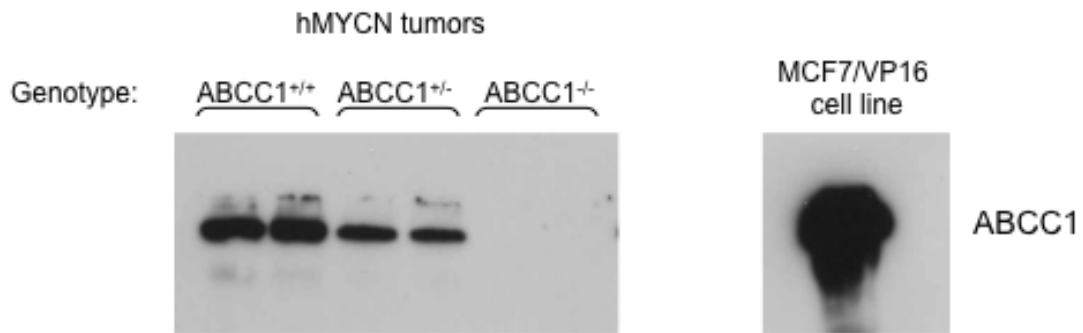

**Supplementary Figure 4.** ABCC1 protein expression in tumors from *Abcc1*<sup>+/+</sup>/*hMYCN*, *Abcc1*<sup>+/-</sup>/*hMYCN* and *Abcc1*<sup>-/-</sup>/*hMYCN* mice. Neuroblastoma tumors were harvested from individual *hMYCN* transgenic mice that were of genotype *Abcc1*<sup>+/+</sup> (lanes 1-2), *Abcc1*<sup>+/-</sup> (lanes 3-4) or *Abcc1*<sup>-/-</sup> (lanes 5-6). Membrane proteins were purified and ABCC1 levels determined by western blot as previously described (10). Even loading of samples was confirmed by Ponceau staining (not shown). MCF7/VP cells, which express high levels of ABCC1, were used as a positive control. *hMYCN* = *human v-myc myelocytomatosis viral related oncogene, neuroblastoma derived*. ABCC1= ATP-binding cassette, sub-family C, member 1.

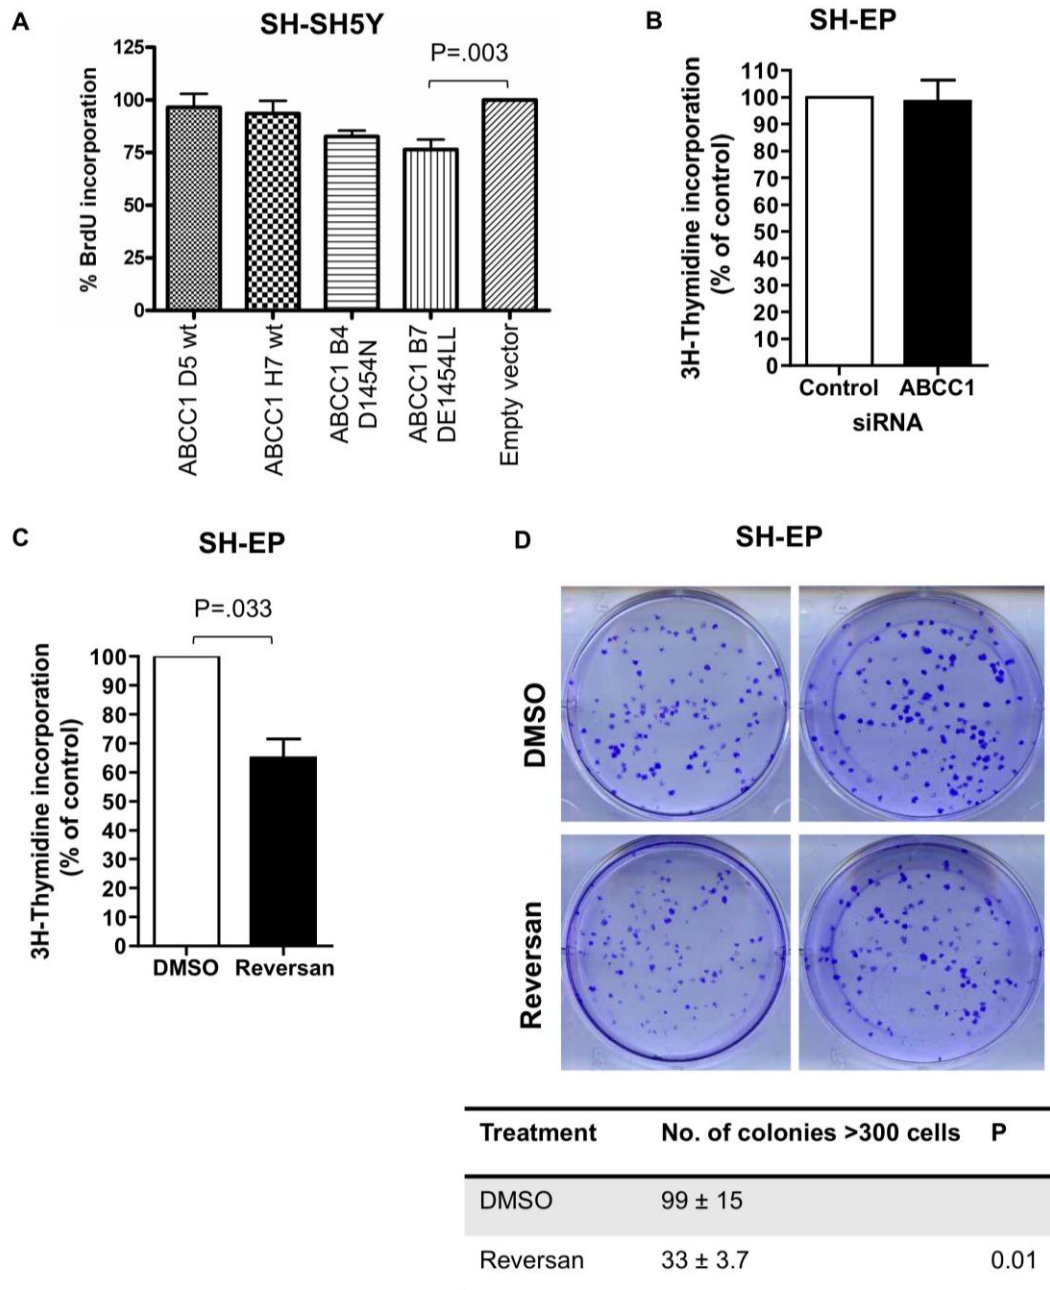

**Supplementary Figure 5.** Impact of *ABCC1* overexpression or suppression on proliferation in human neuroblastoma cells. **A)** Quantification of 5-bromo-2-deoxyuridine (BrdU) incorporation in SH-SY5Y cells expressing high levels of *ABCC1*-wt (clones D5, H7) or catalytically inactive mutants: *ABCC1* D1454N single mutant (clone B4) or *ABCC1* DD1454LL double mutant (clone B7). **B)**  $^3\text{H}$ -Thymidine incorporation in SH-EP cells upon siRNA-mediated suppression of *ABCC1*. **C)**  $^3\text{H}$ -Thymidine incorporation in SH-EP cells upon pharmacological inhibition of *ABCC1* using 5 $\mu\text{M}$  Reversan. **D)** Representative images and quantification showing colony size distribution in SH-EP cells exposed to 5 $\mu\text{M}$  Reversan compared to cells exposed to vehicle control (DMSO, dimethyl sulfoxide). Means displayed in all panels are derived from at least 3 independent experiments. P values were derived from one-sample *t* test vs control ( $H_0$ ,  $\mu=100\%$ ), except for panel **D**, for which two-sided Student's *t* test was used. *ABCC1*= ATP-binding cassette, sub-family C, member 1.

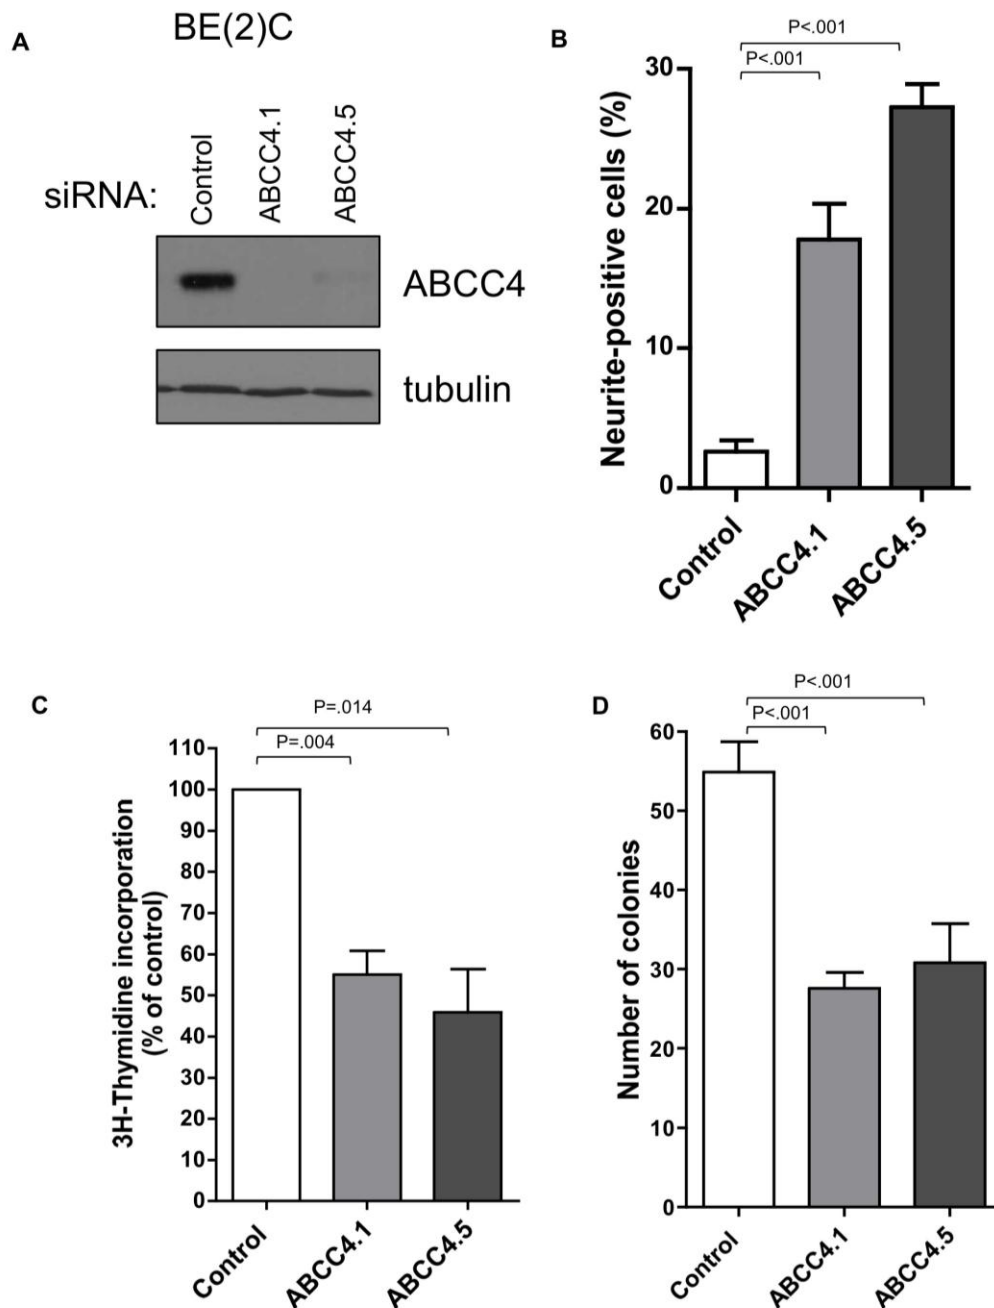

**Supplementary Figure 6.** Impact of *ABCC4* suppression by individual siRNA duplexes in BE(2)-C neuroblastoma cells. **A**) Western blot analysis of *ABCC4* protein expression following exposure of BE(2)-C cells to SMARTpool siRNA duplex 1 (ABCC4.1), independent siRNA duplex 5 (ABCC4.5) or to control siRNA. **B**) Enhanced neurite extension in SH-SY5Y cells upon depletion of *ABCC4*. **C**)  $^3\text{H}$ -thymidine incorporation was reduced in SH-SY5Y cells depleted of *ABCC4*. **D**) Clonogenic capacity upon depletion of *ABCC4* was assayed after 12 days. Means displayed in all panels are derived from at least 3 independent experiments. In panels **B** and **D**, *P* values were derived from one-way analysis of variance followed by two-sided *t* test vs control, while one-sample *t* test was used in panel **C** ( $H_0$ ,  $\mu=100\%$ ). *ABCC4* = ATP-binding cassette, sub-family C, member 4; siRNA = short interfering RNA.

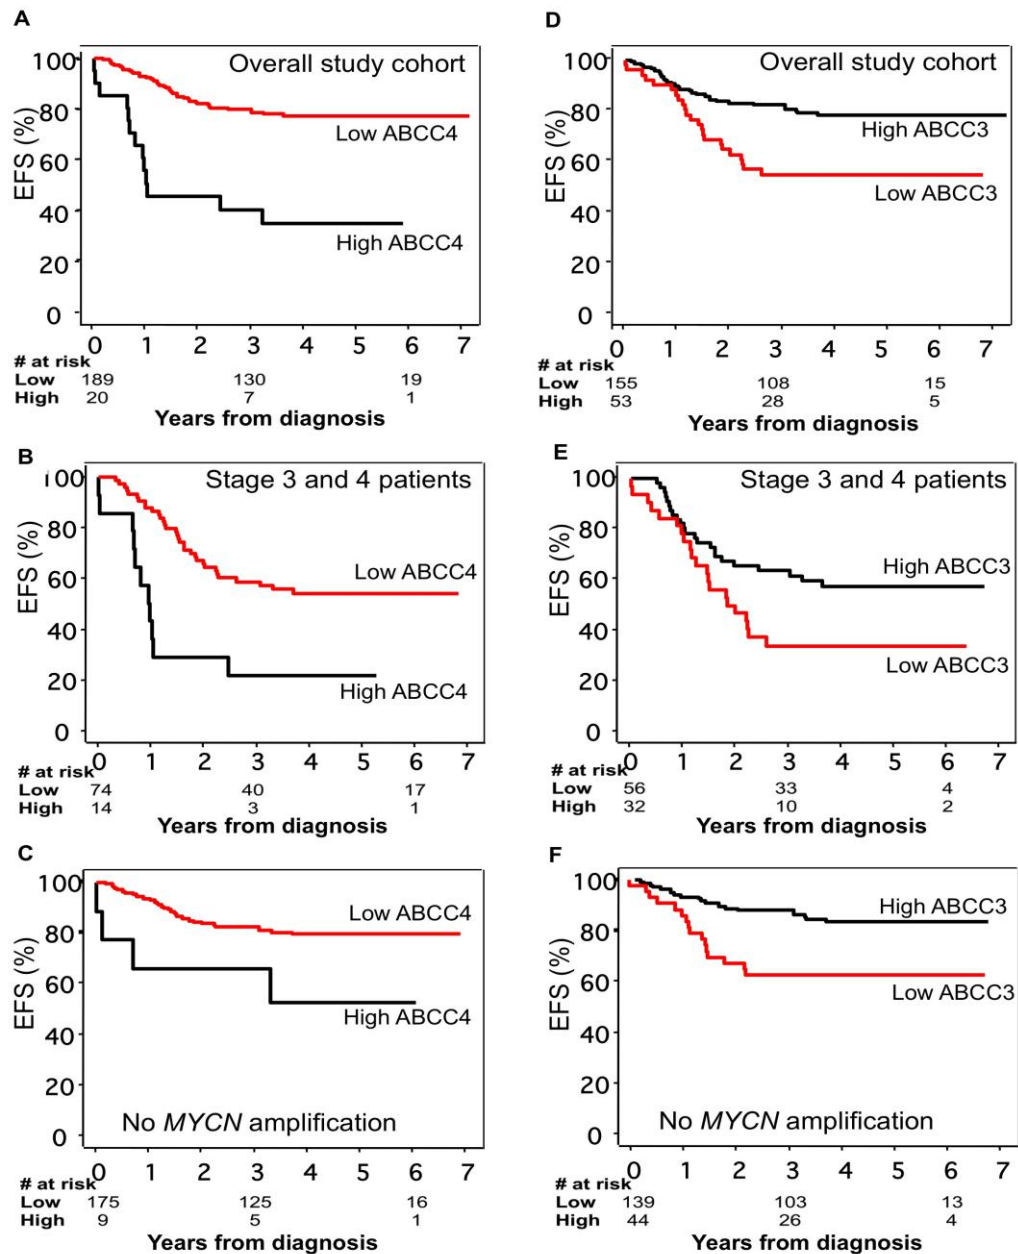

**Supplementary Figure 7.** Prognostic significance of *ABCC3* and *ABCC4* gene expression in neuroblastoma. **A**) Expression of *ABCC4* predicts cumulative event-free survival (EFS) in 209 patients with neuroblastoma (relative hazard = 4.7, 95% CI = 2.5 to 8.9,  $P < .001$ ). Similar associations between high *ABCC4* gene expression and increasingly poor outcome were also observed in subgroups of patients **B**) with Stage 3 or 4 disease (five-year event-free survival rate  $\pm$  SE: high *ABCC4*, 21 $\pm$ 22 % vs low *ABCC4*, 54 $\pm$ 12 %,  $P < .001$ ) or **C**) whose tumors lacked *MYCN* amplification (five-year event-free survival rate  $\pm$  SE: high *ABCC4*, 53 $\pm$ 34 % vs low *ABCC4*,  $P = .02$ ). **D**) Expression of *ABCC3* predicts cumulative event-free survival in 209 patients with neuroblastoma (relative hazard = 2.4, 95% CI = 1.4 to 4.2,  $P = .001$ ). Similar associations between low *ABCC3* gene expression and increasingly poor outcome were also observed in subgroups of patients **E**) with Stage 3 or 4 disease (five-year event-free survival rate  $\pm$  SE: low *ABCC3*, 34 $\pm$ 17 % vs high *ABCC3*, 57 $\pm$ 13 %,  $P = .03$ ) or **F**) whose tumors lacked *MYCN* amplification (five-year event-free survival rate  $\pm$  SE: low *ABCC3*, 63 $\pm$ 14 % vs high *ABCC3*, 84 $\pm$ 7 %,  $P = .0016$ ). At 0, 3 and 6 years from diagnosis, the number of patients at risk of relapse are shown. SE = standard error; *MYCN* = *v-myc myelocytomatosis viral related oncogene, neuroblastoma derived*. *ABCC* = ATP-binding cassette, sub-family C.



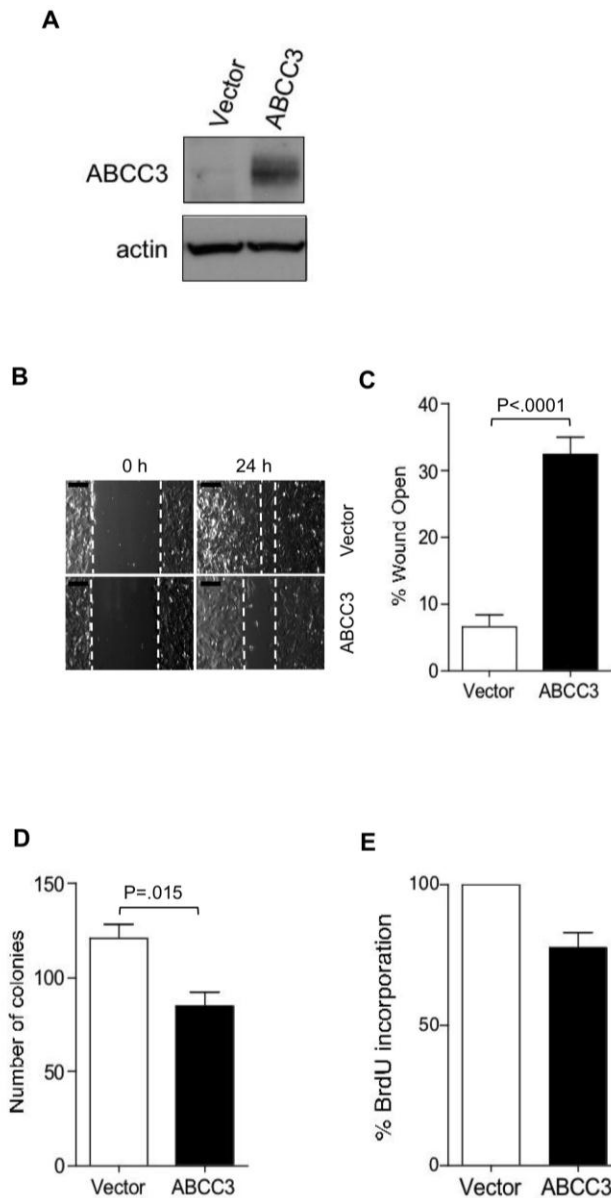

**Supplementary Figure 8.** Impact of stable ABCC3 expression in BE(2)-C cells. **A)** Western blot analysis of ABCC3 protein expression following stable retroviral transduction and mass-culturing of BE(2)-C cells with either empty vector or pCMV-ABCC3 (kindly provided by P. Borst, Netherlands Cancer Institute, (1)). **B)** Representative images of wound closure assay. Scale bar = 100 $\mu$ m. **C)** Quantification depicting impaired motility of BE(2)-C cells stably overexpressing ABCC3. **D)** Clonogenic capacity was significantly reduced in BE(2)-C cells overexpressing ABCC3. **E)** Effect of ABCC3 overexpression on cell proliferation in BE(2)-C cells was measured by 5-bromo-2-deoxyuridine (BrdU) incorporation. One-way analysis of variance followed by two-sided *t* tests vs control were used to generate *P* values for wound closure and colony forming assays whereas one-sample *t* test was used for BrdU incorporation ( $H_0, \mu=100\%$ ). In all panels means are derived from 3 replicate experiments and error bars represent standard error of the mean. ABCC3 = ATP-binding cassette, sub-family C, member 3.

**Supplementary Table 1.** DNA sequence of primers and TaqMan assay codes of assays used for real-time quantitative PCR\*

| <b>Gene Primer or Probe</b> | <b>Sequence</b>               |
|-----------------------------|-------------------------------|
| ABCC1 F                     | TCCTCTATCTCTCCCGACATGAC       |
| ABCC1 R                     | CCCGACTTCTTTCCAGAAAG          |
| ABCC1 PROBE                 | AGGTCTGCCAGCAGACGATCCA        |
| ABCC2 F                     | ACAGCTTTCGTCGAACACTTAGC       |
| ABCC2 R                     | CATTCGAGTTTTCAAGGAGTTTC       |
| ABCC2 PROBE                 | AGGCATCTGAAGTCC               |
| ABCC3 F                     | AGCTGTGGCCGTGAAGATG           |
| ABCC3 R                     | TGCGCGAGTCCTTCAATTC           |
| ABCC3 PROBE                 | CCTTCCAGGTAAAGCA              |
| ABCC4 F                     | CGAGTAGCCATGTGCCATATGA        |
| ABCC4 R                     | TGACTATCTGGCCTGTGGTTGTCT      |
| ABCC4 PROBE                 | CGGAAGGCACTTCGTCTTAGTAACATGGC |
| ABCC5 F                     | CATTCGAGGAGTTGTCTTTGTCAA      |
| ABCC5 R                     | CCTTCGAAAAGCTCGTCAT           |
| ABCC5 PROBE                 | CTGCGAGCTTCCTCCCGGCTG         |
| B2M F                       | ACTGGTCTTTCTATCTCTTGTACTACTGA |
| B2M R                       | TGATGCTGCTTACATGTCTCGAT       |
| B2M PROBE                   | TGCCTGCCGTGTGAACCATGTGAC      |
| <b>Gene</b>                 | <b>TaqMan assay code</b>      |
| ABCC6                       | Hs00184566_m1                 |
| ABCC7                       | Hs00357011_m1                 |
| ABCC8                       | Hs00165861_m1                 |
| ABCC9                       | Hs00245832_m1                 |
| ABCC10                      | Hs00375716_m1                 |
| ABCC11                      | Hs00261567_m1                 |
| ABCC12                      | Hs00264354_m1                 |

\* PCR, polymerase chain reaction; ABCC = ATP-binding cassette, sub-family C; B2M, beta-2 microglobulin.

**Supplementary Table 2.** Relation of age and tumor stage at diagnosis to ABCC gene expression in the tumors in the 209 study patients with neuroblastoma

| Clinical characteristics | No. of patients    |     |      |                    |     |        |                    |     |     |                    |     |        |
|--------------------------|--------------------|-----|------|--------------------|-----|--------|--------------------|-----|-----|--------------------|-----|--------|
|                          | ABCC2 expression * |     |      | ABCC5 expression * |     |        | ABCC8 expression * |     |     | ABCC9 expression * |     |        |
|                          | High               | Low | P    | High               | Low | P      | High               | Low | P   | High               | Low | P      |
| Age                      |                    |     |      |                    |     |        |                    |     |     |                    |     |        |
| < 1 yr                   | 57                 | 38  | .008 | 64                 | 31  | < .001 | 54                 | 41  | .09 | 64                 | 31  | < .001 |
| ≥ 1 yr                   | 46                 | 66  |      | 38                 | 73  |        | 49                 | 62  |     | 40                 | 71  |        |
| Tumor stage †            |                    |     |      |                    |     |        |                    |     |     |                    |     |        |
| Favorable                | 48                 | 57  | .15  | 49                 | 56  | .56    | 54                 | 51  | .77 | 58                 | 47  | .19    |
| Unfavorable              | 50                 | 38  |      | 45                 | 43  |        | 42                 | 45  |     | 39                 | 48  |        |

\* The level of expression was considered high or low in relation to the median of  $\Delta\Delta\text{Ct}$  values for all tumors analyzed. *P* values are derived using two-sided Fisher's exact tests.

† Tumor stage was categorized as favorable (INSS stages 1, 2A/2B or 4S) or unfavorable (INSS stages 3 or 4), and was unknown in 15 cases.

*ABCC* = *ATP-binding cassette, sub-family C*;  $\Delta\Delta\text{Ct}$  method is the comparative threshold cycle method of transcript quantification. INSS = International Neuroblastoma Staging System.

**Supplementary Table 3.** Univariate analysis of ABCC gene expression and outcome in neuroblastoma

| <i>ABCC</i> gene expression | Event-free survival           |     | Overall survival              |     |
|-----------------------------|-------------------------------|-----|-------------------------------|-----|
|                             | Relative Hazard *<br>(95% CI) | P † | Relative Hazard *<br>(95% CI) | P † |
| <i>ABCC2</i> (n=208)        | 1.4 (0.8 to 2.4)              | .22 | 1.5 (0.8 to 2.7)              | .17 |
| <i>ABCC5</i> (n=207)        | 1.4 (0.8 to 2.4)              | .25 | 1.3 (0.7 to 2.3)              | .37 |
| <i>ABCC8</i> (n=207)        | 1.0 (0.6 to 1.8)              | .88 | 1.15 (0.5 to 1.6)             | .63 |
| <i>ABCC9</i> (n=207)        | 1.3 (0.7 to 2.2)              | .37 | 1.3 (0.7 to 2.3)              | .45 |

\*Relative hazards were calculated as the antilogs of the regression co-efficients in the proportional hazards regression. CI = confidence interval; *ABCC* = *ATP-binding cassette, sub-family C*.

†Log-rank test

### References to Supporting Information

1. Kool, M., van der Linden, M., de Haas, M., et al. 1999. MRP3, an organic anion transporter able to transport anti-cancer drugs. *Proc Natl Acad Sci U S A* 96(12):6914-6919.
